# Supplementary material for: Doping of aluminum (Al) into copper sulfide (CuS) nanocrystals enhanced their solar spectral selectivity
Source: Royal Society of Chemistry journal article supplement (doi:10.1039/c9ce00668k), 2019-01-01
Supplement: c9ce00668k1.pdf [file c9ce00668k1.pdf]

## Electronic Supporting Information (ESI)

### Copper Sulfide (CuS) nanocrystals doping Aluminum (Al) enhance their solar spectral selectivity

Jiang Jing,<sup>a</sup> Xiaoyu Gu,<sup>\*a</sup> Sheng Zhang,<sup>a</sup> Jun Sun,<sup>a</sup> Yu Chen,<sup>b</sup> and Tongbing Sun<sup>b</sup>

*\* Corresponding Author.*

*<sup>a</sup>State Key Laboratory of Organic-Inorganic Composites, Beijing University of Chemical Technology, Beijing, 100029, China. E-mail: guxy@mail.buct.edu.cn..*

*<sup>b</sup>Beijing Huateng Hightech Corp., Beijing, 100084, China.*

## Contents

**Scheme S1.** Preparation of Al-CuS nanocrystals.

**Figure S1.** EDS spectra of (a) CuS and (b) Al-CuS

**Figure S2.** SEM image (a) and TEM image (c) of CuS; SEM image (b) and TEM image (d) of Al-doped CuS nanocrystals.

**Figure S3.** Uv-vis-NIR transmission spectra of PVA, CuS/PVA, Al-CuS /PVA film.

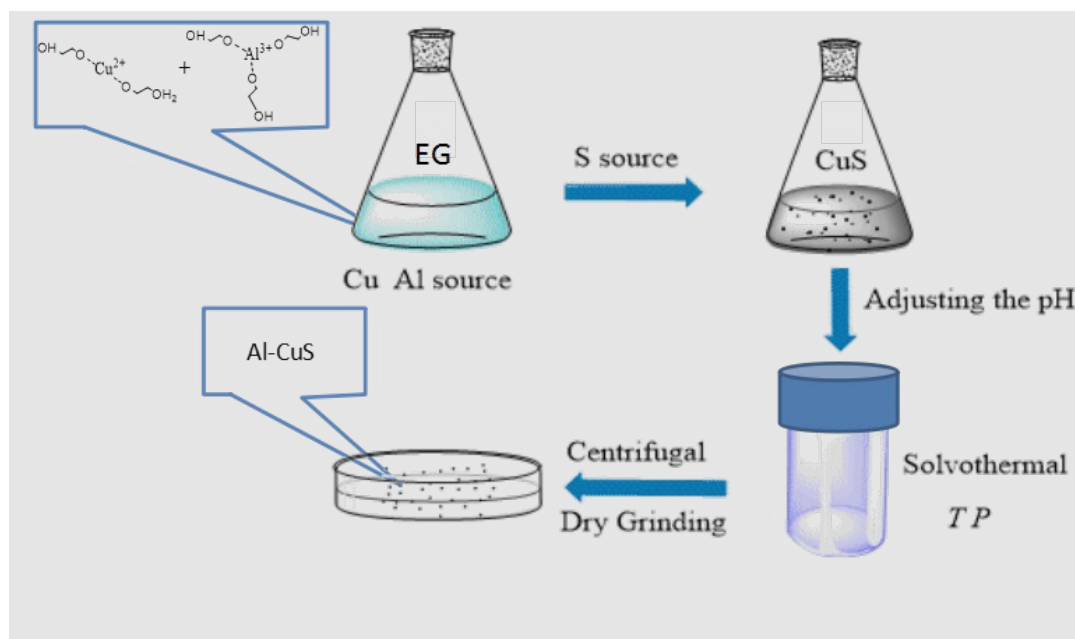

**Scheme S1.** Preparation of Al-CuS nanocrystals.

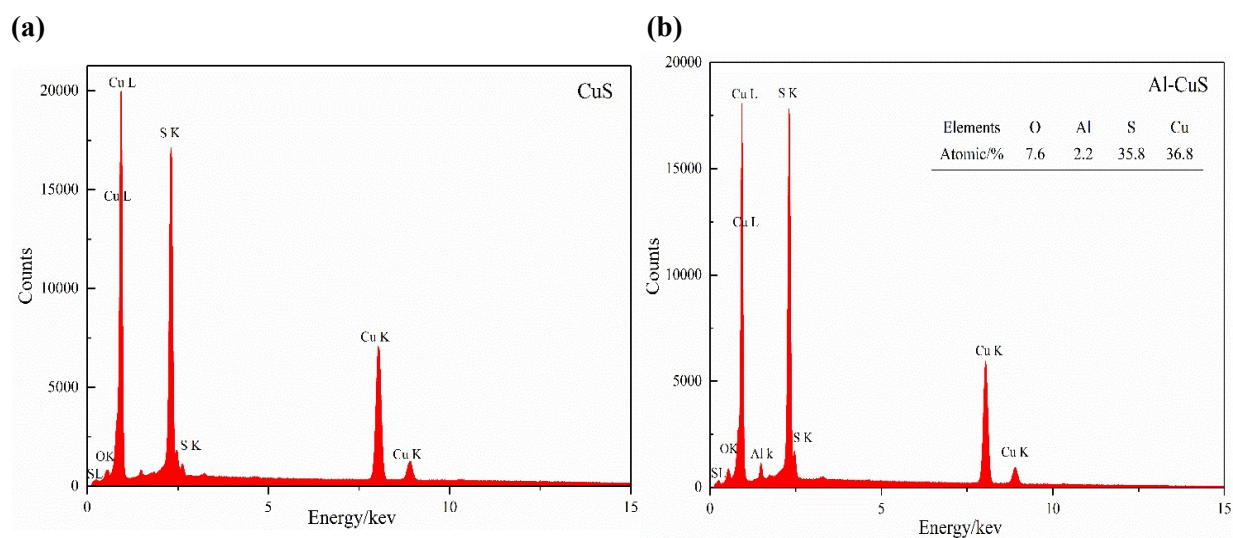

**Figure S1** EDS spectra of (a) CuS and (b) Al-CuS, molar ratio of Al: Cu is 6: 10.

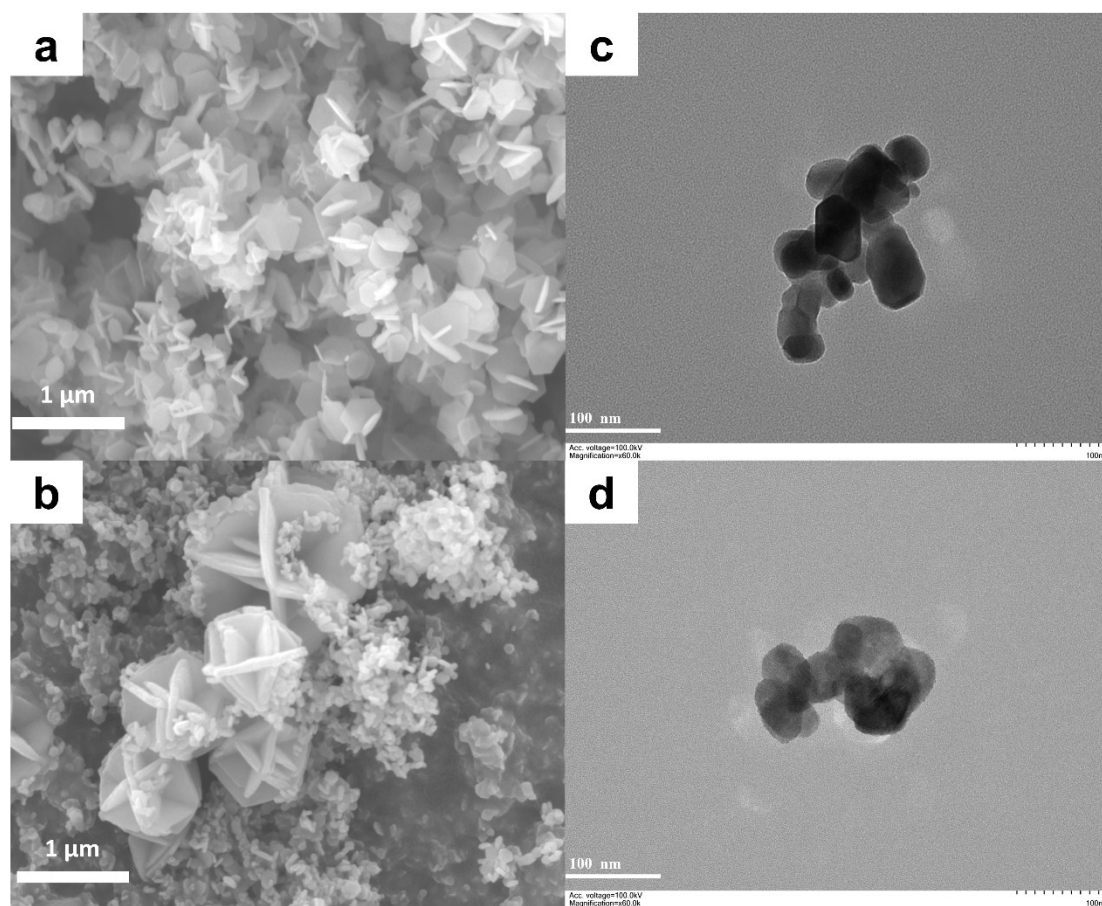

**Figure S2.** SEM image (a) and TEM image (c) of CuS; SEM image (b) and TEM image (d) of Al-doped CuS nanocrystals.

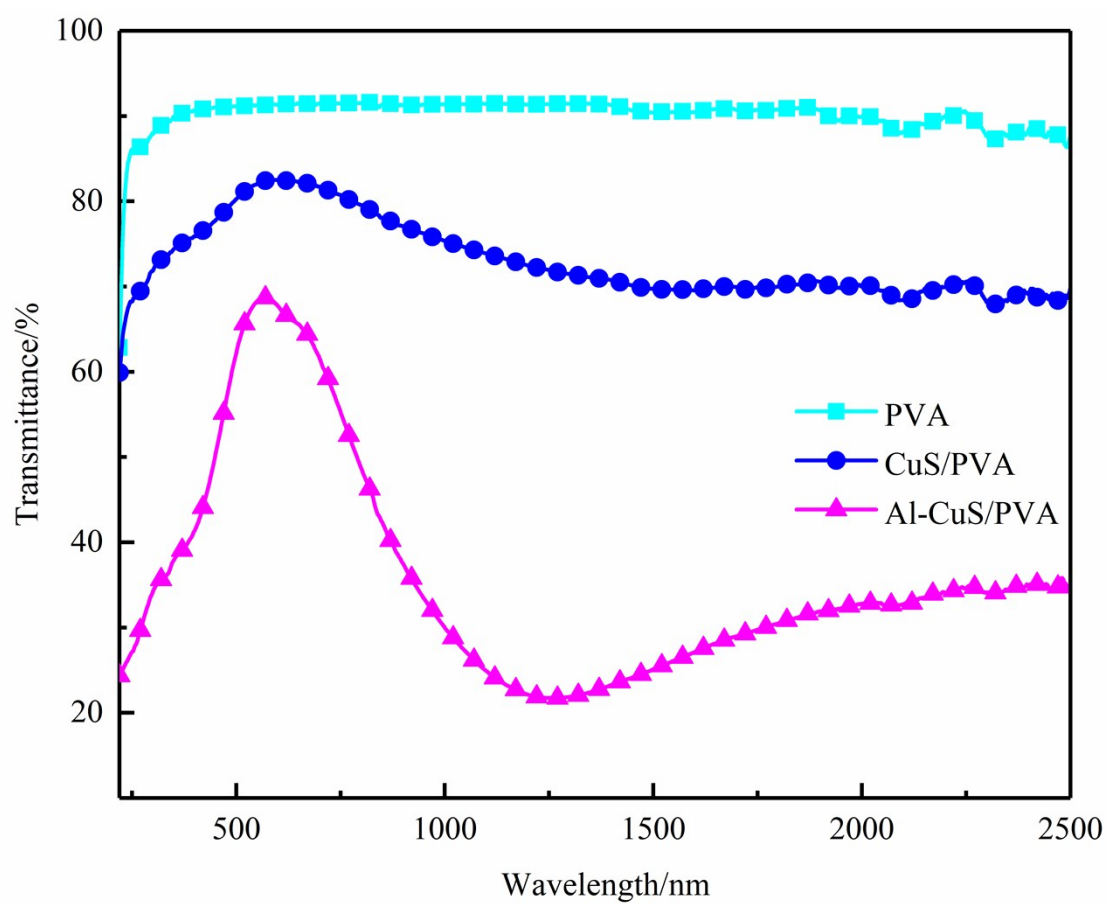

**Figure S3.** Uv-vis-NIR transmission spectra of PVA, CuS/PVA, Al-CuS /PVA film.
