# Supplementary figures and images for: Doping of aluminum (Al) into copper sulfide (CuS) nanocrystals enhanced their solar spectral selectivity
Source: Royal Society of Chemistry journal article supplement (doi:10.1039/c9ce00668k), 2019-01-01

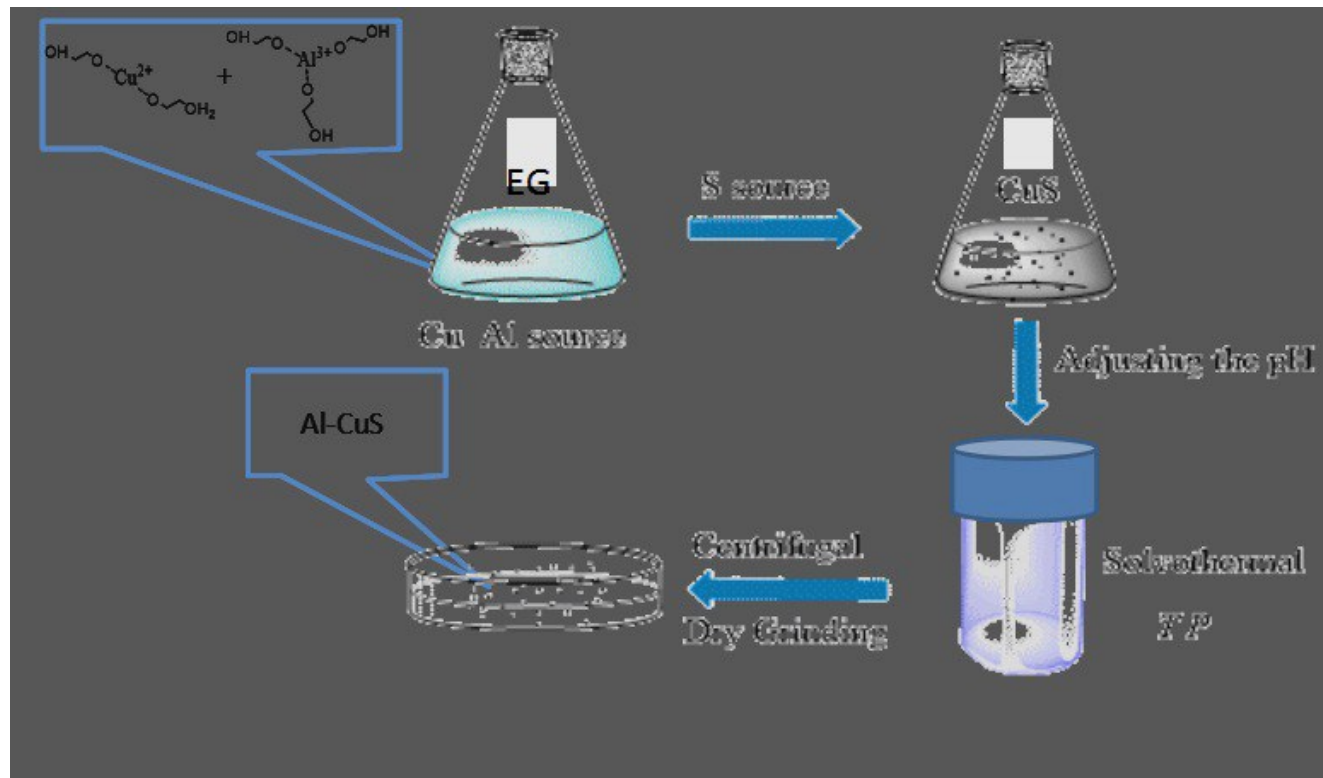

Supplement: c9ce00668k6.pdf [file c9ce00668k6.pdf]
